# Supplementary material for: Identification of Alzheimer’s Disease by Molecular Imaging: Progress and Prospects
Source: Preprints.org preprint supplement (doi:10.20944/preprints202401.0477.v1), 2024-01-05
Supplement: Supplementary file 2 [file supplementary]

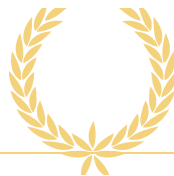

We certify that the following article

## Identification of Alzheimer's Disease by Molecular Imaging: Progress and Prospects

Dongdong Qin

has undergone English language editing by MDPI. The text has been checked for correct use of grammar and common technical terms, and edited to a level suitable for reporting research in a scholarly journal.

MDPI uses experienced, native English speaking editors. Full details of the editing service can be found at

► <https://www.mdpi.com/authors/english>.

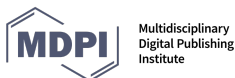

Basel, Switzerland  
December 2023

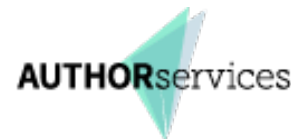

english-75637
